# Supplementary material
Source: PubMed Central journal article supplement (PMC341814)

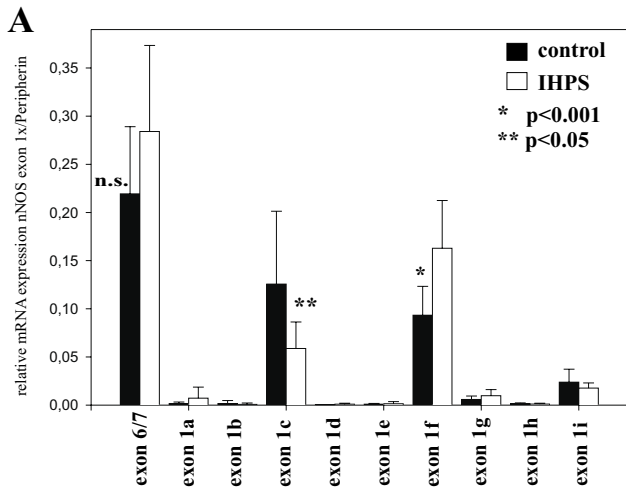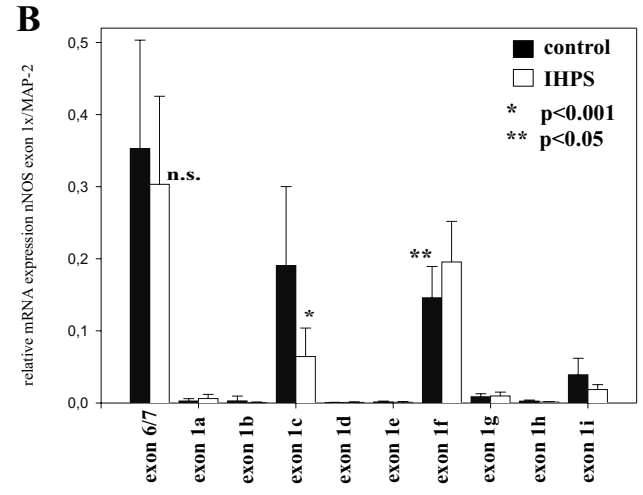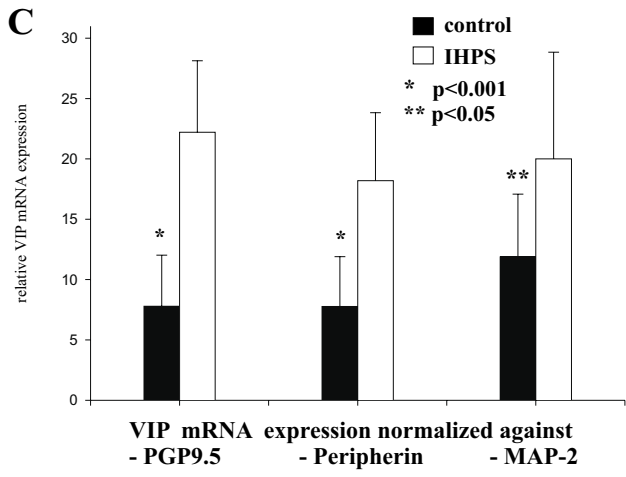

Supplement: pnas_0305473101_3.pdf [file pnas_0305473101_3.pdf]
